# Supplementary material for: Six1 regulates stem cell repair potential and self-renewal during skeletal muscle regeneration
Source: PubMed Central journal article supplement — J Cell Biol. 2012 Sep 3;198(5):815–32. doi: 10.1083/jcb.201201050 (PMC3432771; doi:10.1083/jcb.201201050), 2012-09-03
Supplement: supp_jcb.201201050_JCB_201201050_sm.pdf [file supp_jcb.201201050_JCB_201201050_sm.pdf]

Le Grand et al., <http://www.jcb.org/cgi/content/full/jcb.201201050/DC1>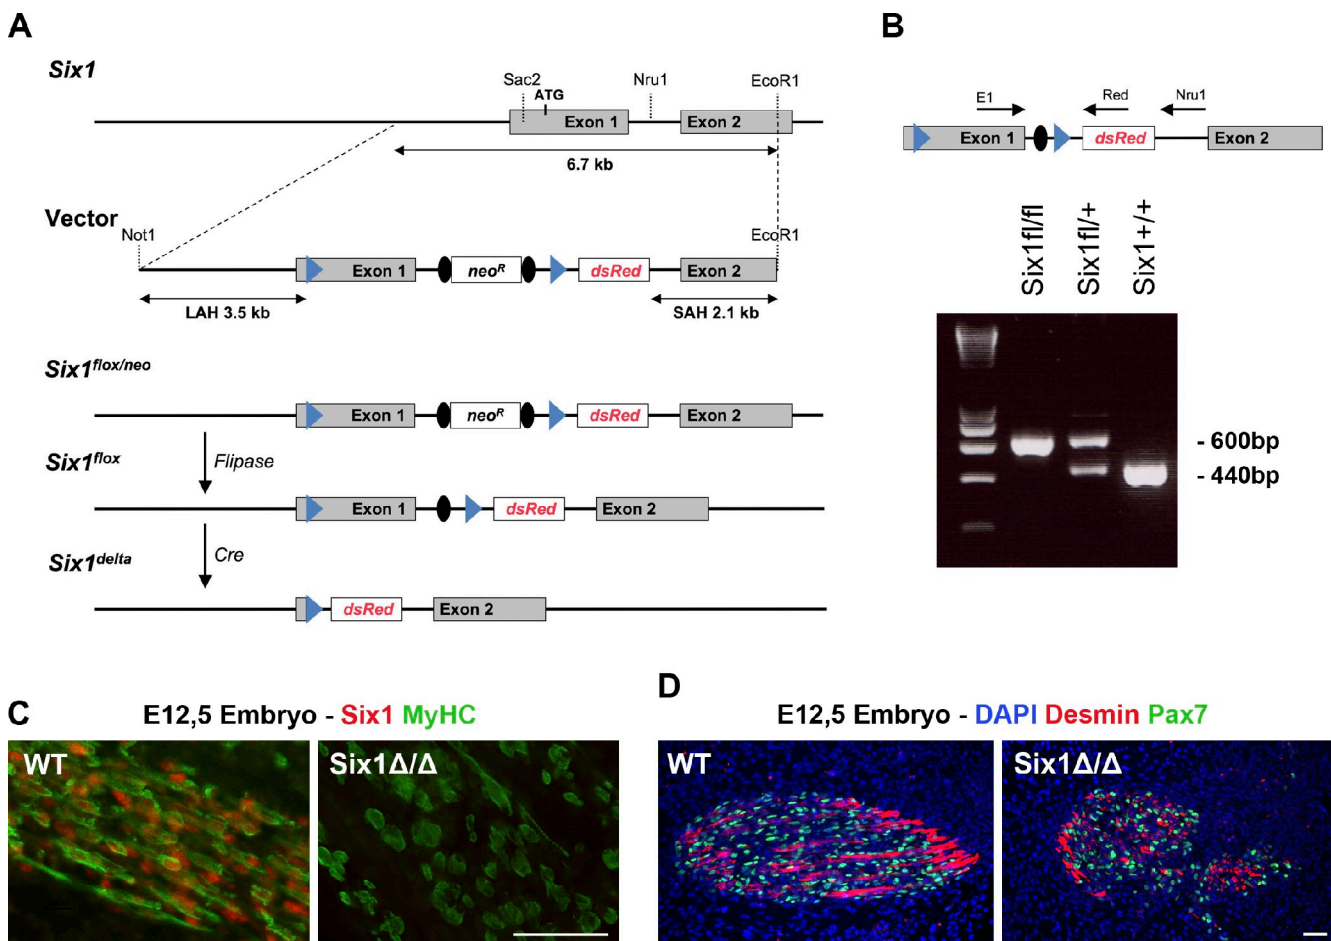

Figure S1. **The *Six1-fllox* allele used for Cre-mediated *Six1* gene inactivation.** (A) Schematic representation of the wild-type *Six1* locus, with the restriction sites used in the present study. The 3.5-kb 5' and 2.1-kb 3' homologous fragments are indicated by two-headed arrows. The *Six1-loxP* targeting fragment is shown with loxP sites as blue arrowheads. The 5' lox site is integrated in the 5' untranslated region of *Six1* first exon at the *Sac2* restriction site. The targeted *Six1* mutant alleles after Flip (Schaft et al., 2001) and Cre excisions are depicted below. Schematic representations are not drawn to scale. (B) Schematic representation of the *Six1-fllox* locus, with PCR primers used for genotyping shown with black arrows. PCR analysis of genomic DNA extracted from wild-type, heterozygous, and homozygous mutant mice and amplified with the three primers. (C) We generated *Six1Δ* mice by crossing *Six1-fllox* mice with *Ella-Cre* mice (provided by F. Relaix, Institut de Myologie, Paris, France; Rodríguez et al., 2000) to mediate total recombination of the *Six1-fllox* allele. Cryosections of 12.5-d post-coitum wild-type and *Six1<sup>Δ/Δ</sup>* mouse embryos at the dorsal level are shown. MyHC protein immunolocalization marks embryonic myofibers and *Six1* protein immunolocalization marks nuclei of myogenic cells. No *Six1* proteins could be detected on *Six1<sup>Δ/Δ</sup>* cryosections. (D) Cryosections of 12.5-d post-coitum wild-type and *Six1<sup>Δ/Δ</sup>* mouse embryos at the hind limb level. Desmin protein immunolocalization marks differentiated muscle cells, and *Pax7* protein immunolocalization marks proliferating myogenic progenitors. *Six1<sup>Δ/Δ</sup>* embryos exhibit altered primary myogenesis at the distal anterior part of developing limb, recapitulating the phenotypes caused by the germline *Six1-LacZ* mutation (Laclef et al., 2003). Bars, 10  $\mu$ m.

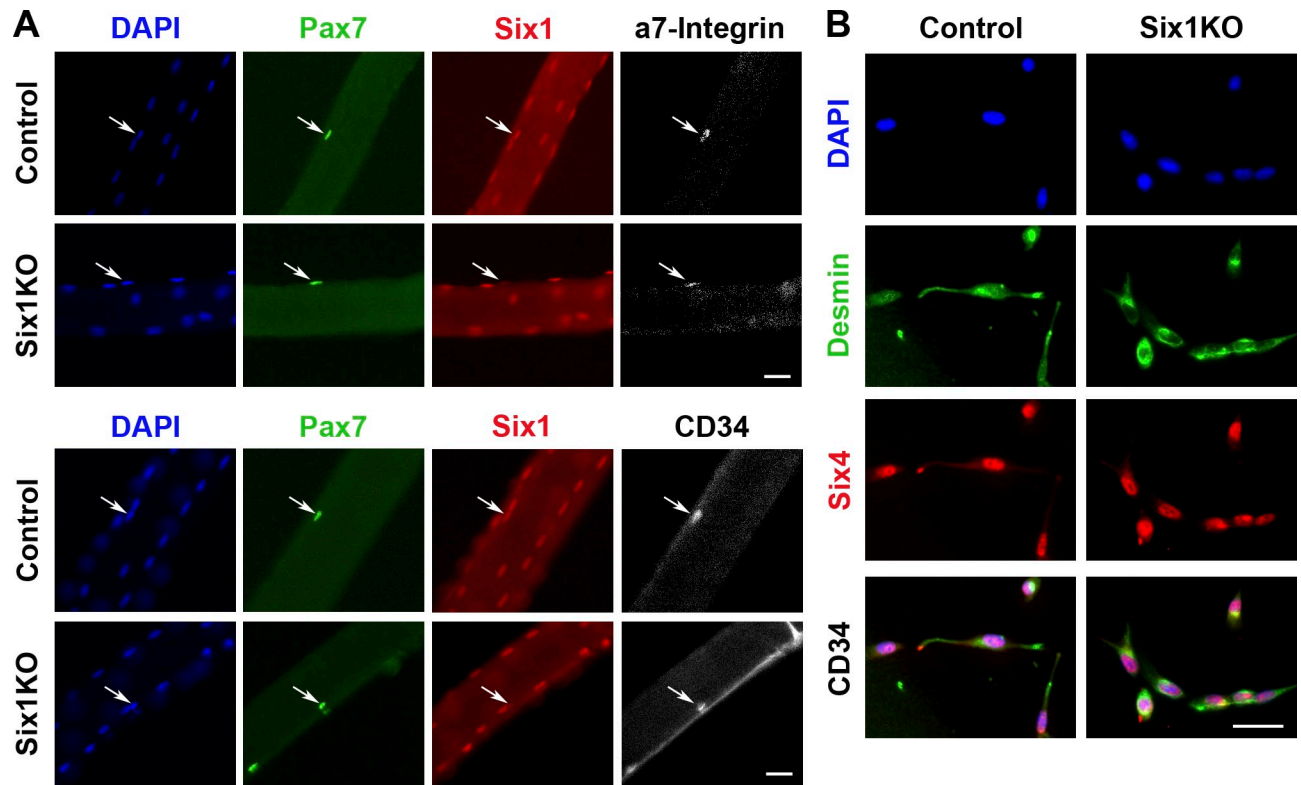

Figure S2. **Conditional *Six1* mutant cells do not lose SC characteristics.** (A) EDL single myofibers from control and Six1KO muscles were immunolocalized for Pax7 and Six1 proteins as well as the SC markers  $\alpha$ 7-Integrin and CD34 proteins at 6 wk after TM injections. Pax7<sup>+</sup>/Six1<sup>-</sup> cells retain expression of specific SC markers. (B) Control and Six1KO myogenic cells grown for 6 d were immunolocalized for Desmin and Six4 proteins. *Six1* gene disruption does not induce up-regulation of Six4 expression. Bars, 10  $\mu$ m.

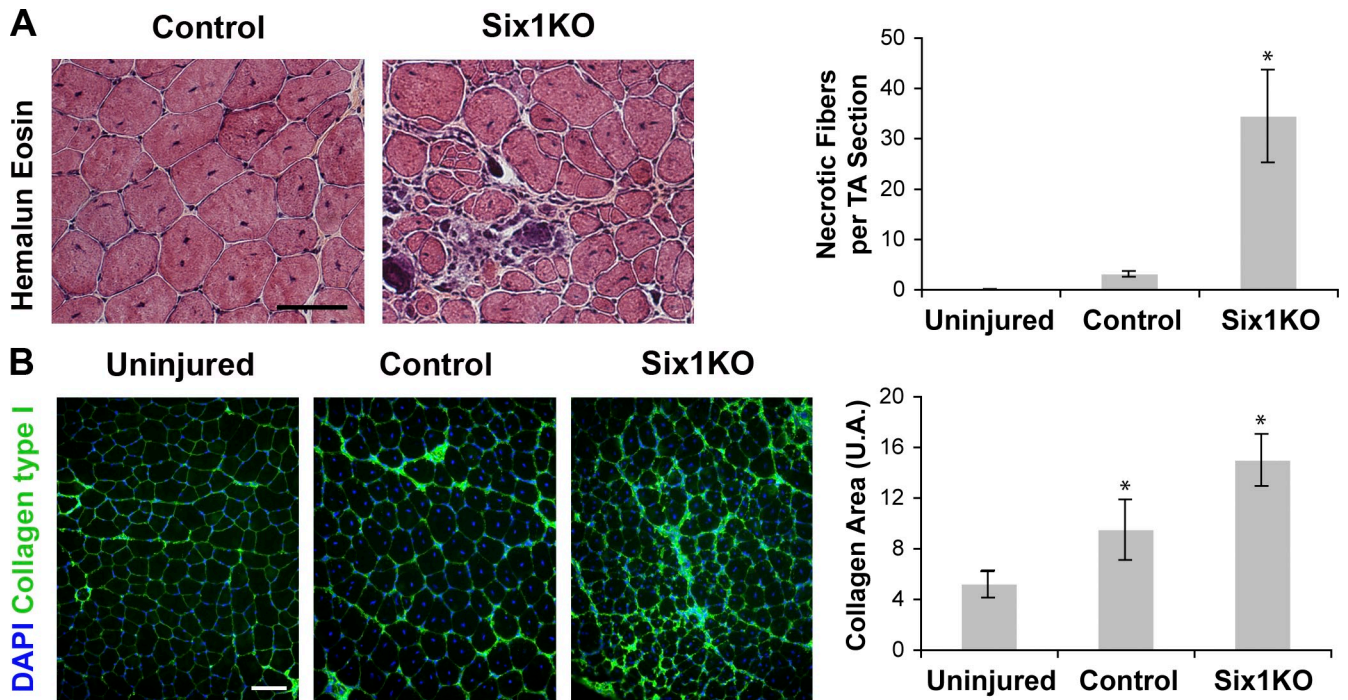

Figure S3. **Impaired tissue repair in regenerated Six1KO muscles.** Cryosections of control and Six1KO regenerated TA muscles 14 d after CTX injection. (A) Hemalun-Eosin staining. Regeneration of the tissue induces necrosis of numerous myofibers in Six1KO animals. (B) Collagen type I staining shows fibrous/connective tissue. Note the increased fibrosis in Six1KO muscles compared with controls. Error bars indicate standard deviations. \*,  $P < 0.01$ .

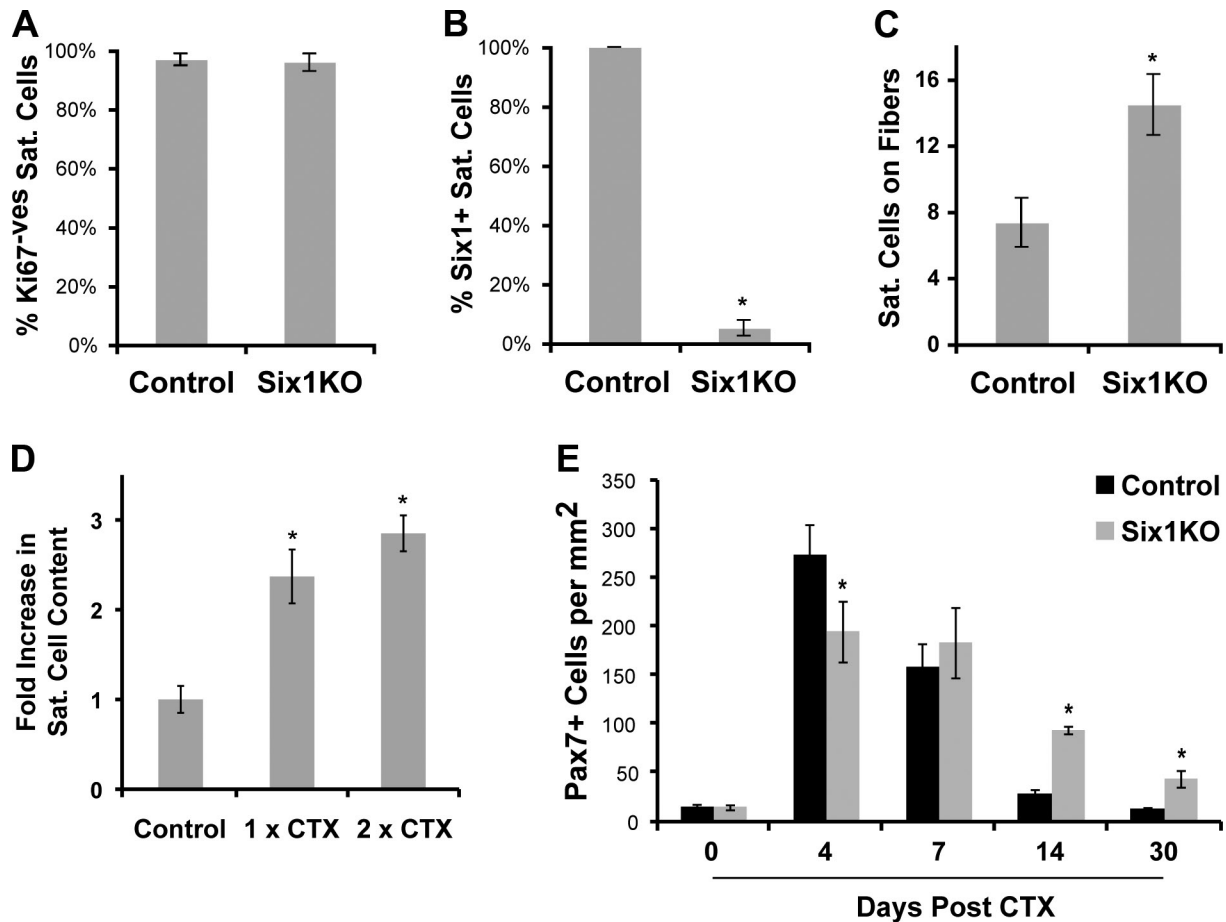

Figure S4. **Satellite cell states within regenerated muscles.** Muscles were analyzed 30 d after CTX injury. (A) More than 97% of renewed sublamina Pax7<sup>+</sup> SCs from both control and Six1KO mice were quiescent ( $n = 2$ ). (B) More than 95% of renewed SCs from Six1KO mice were negative for Six1 expression ( $n = 3$ ). (C) The SC pool was increased 2.2-fold in regenerated Six1KO EDL muscles ( $n = 4$ ). (D) The SC pool was increased 2.8-fold in regenerated Six1KO TA after two rounds of regeneration muscles ( $n = 4$ ). (E) The Pax7<sup>+</sup> cell population was quantified on TA muscle cryosections at various times during the regeneration process. Pax7<sup>+</sup> cells accumulate in Six1KO muscles between 7 and 14 d after CTX injection. Error bars indicate standard deviations. \*,  $P < 0.01$ .

## References

- Laclef, C., G. Hamard, J. Demignon, E. Souil, C. Houbbron, and P. Maire. 2003. Altered myogenesis in Six1-deficient mice. *Development*. 130:2239–2252. <http://dx.doi.org/10.1242/dev.00440>
- Rodríguez, C.I., F. Buchholz, J. Galloway, R. Sequerra, J. Kasper, R. Ayala, A.F. Stewart, and S.M. Dymecki. 2000. High-efficiency deleter mice show that FLP is an alternative to Cre-loxP. *Nat. Genet.* 25:139–140. <http://dx.doi.org/10.1038/75973>
- Schaft, J., R. Ashery-Padan, F. van der Hoeven, P. Gruss, and A.F. Stewart. 2001. Efficient FLP recombination in mouse ES cells and oocytes. *Genesis*. 31:6–10. <http://dx.doi.org/10.1002/gene.1076>
